# Supplementary material
Source: PubMed Central journal article supplement (PMC5280024)
Supplement: ASN.2016030338SupplementaryData.pdf [file ASN.2016030338SupplementaryData.pdf]

**A**

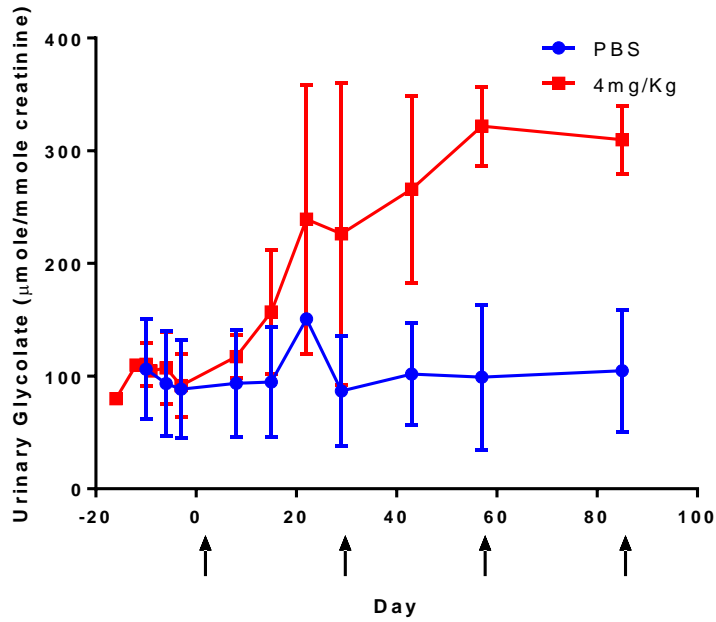

**B**

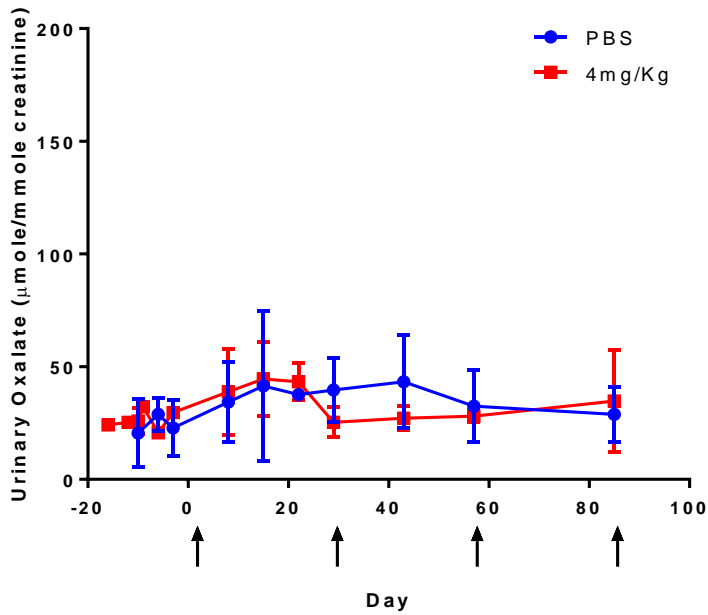

**Supplemental Figure 1. Urinary glycolate and oxalate in cynomolgus monkeys following multiple doses of ALN-GO1. (A) Urinary glycolate and (B) urinary oxalate levels. Points represent the mean of 3 animals and error bars depict the standard deviation. Arrows indicate dosing days.**

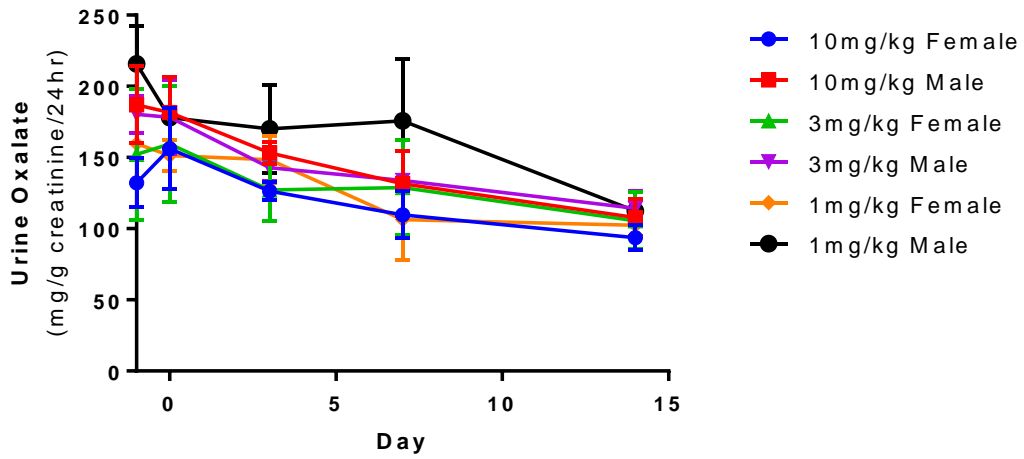

**Supplemental Figure 2. Urinary Oxalate Levels in Male and Female Sprague Dawley Rats Following a Single dose of HAO1 siRNA.** Levels of urinary oxalate pre-dose (Day -1, Day 0) and post-dose (Day 3, Day 7, Day 14) after a single dose of HAO1 siRNA 2. Points represent the mean of 2 or 3 animals and error bars depict standard deviation.

**A**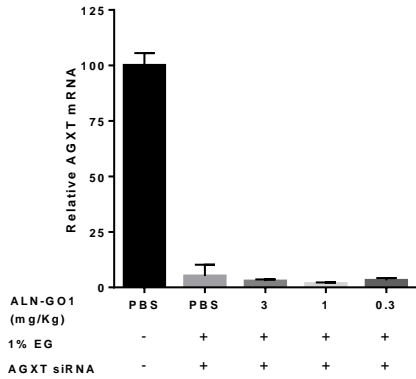**B**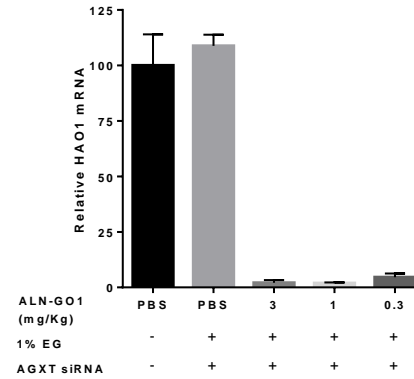**C**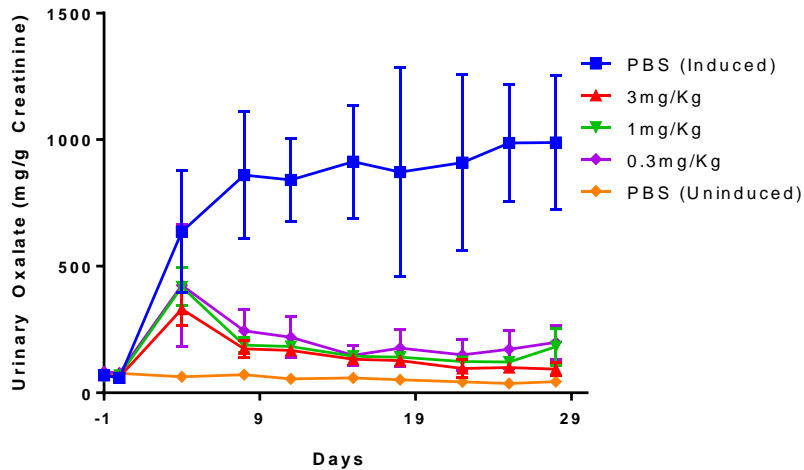

**Supplemental Figure 3. Urinary oxalate changes in an Induced rat model of hyperoxaluria following multiple doses of ALN-GO1.** Levels of **(A)** liver AGXT mRNA on Day 28 (7 days post-last dose) following one i.v. dose per week for 4 weeks of alanine-glyoxylate aminotransferase (AGXT) siRNA formulated in an LNP lipid nanoparticle. Levels of **(B)** liver HAO1 mRNA on Day 28 (7 days post-last dose) following one subcutaneous dose per week for 4 weeks with ALN-GO1 **(C)** 24-hour urinary oxalate. Bars represent the mean of 2 or 3 animals and error bars depict the standard deviation. Points represent the mean of 2 or 3 animals and error bars depict the standard deviation.
